# Supplementary material
Source: PubMed Central journal article supplement (PMC1472439)

+/+

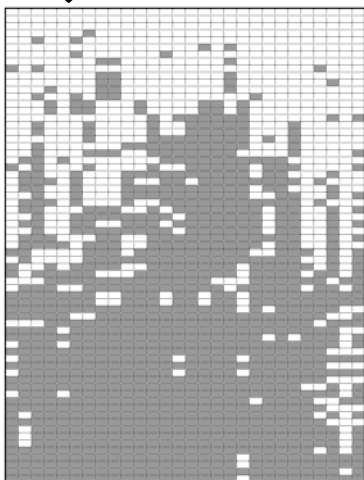

*CLPG<sup>Mat/+</sup>*

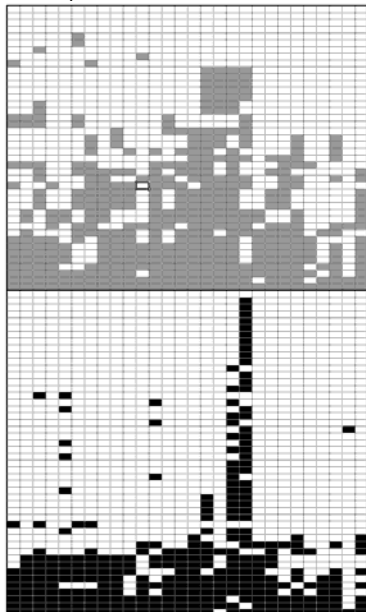

*+/CLPG<sup>Pat</sup>*

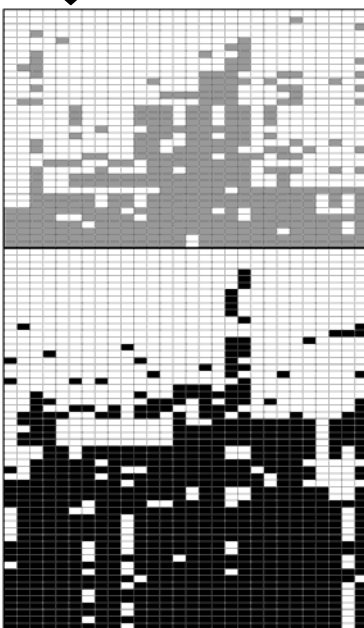

*CLPG/CLPG*

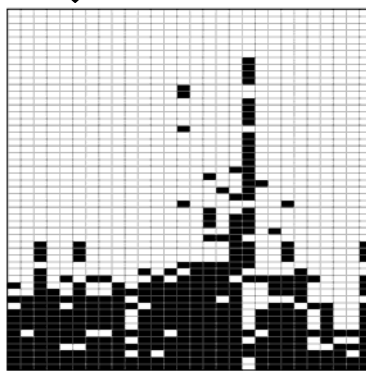

1 5 10 15 20 25 28

1 5 10 15 20 25 28

CpG dinucleotide

Supplement: pnas_0602844103_1.pdf [file pnas_0602844103_1.pdf]

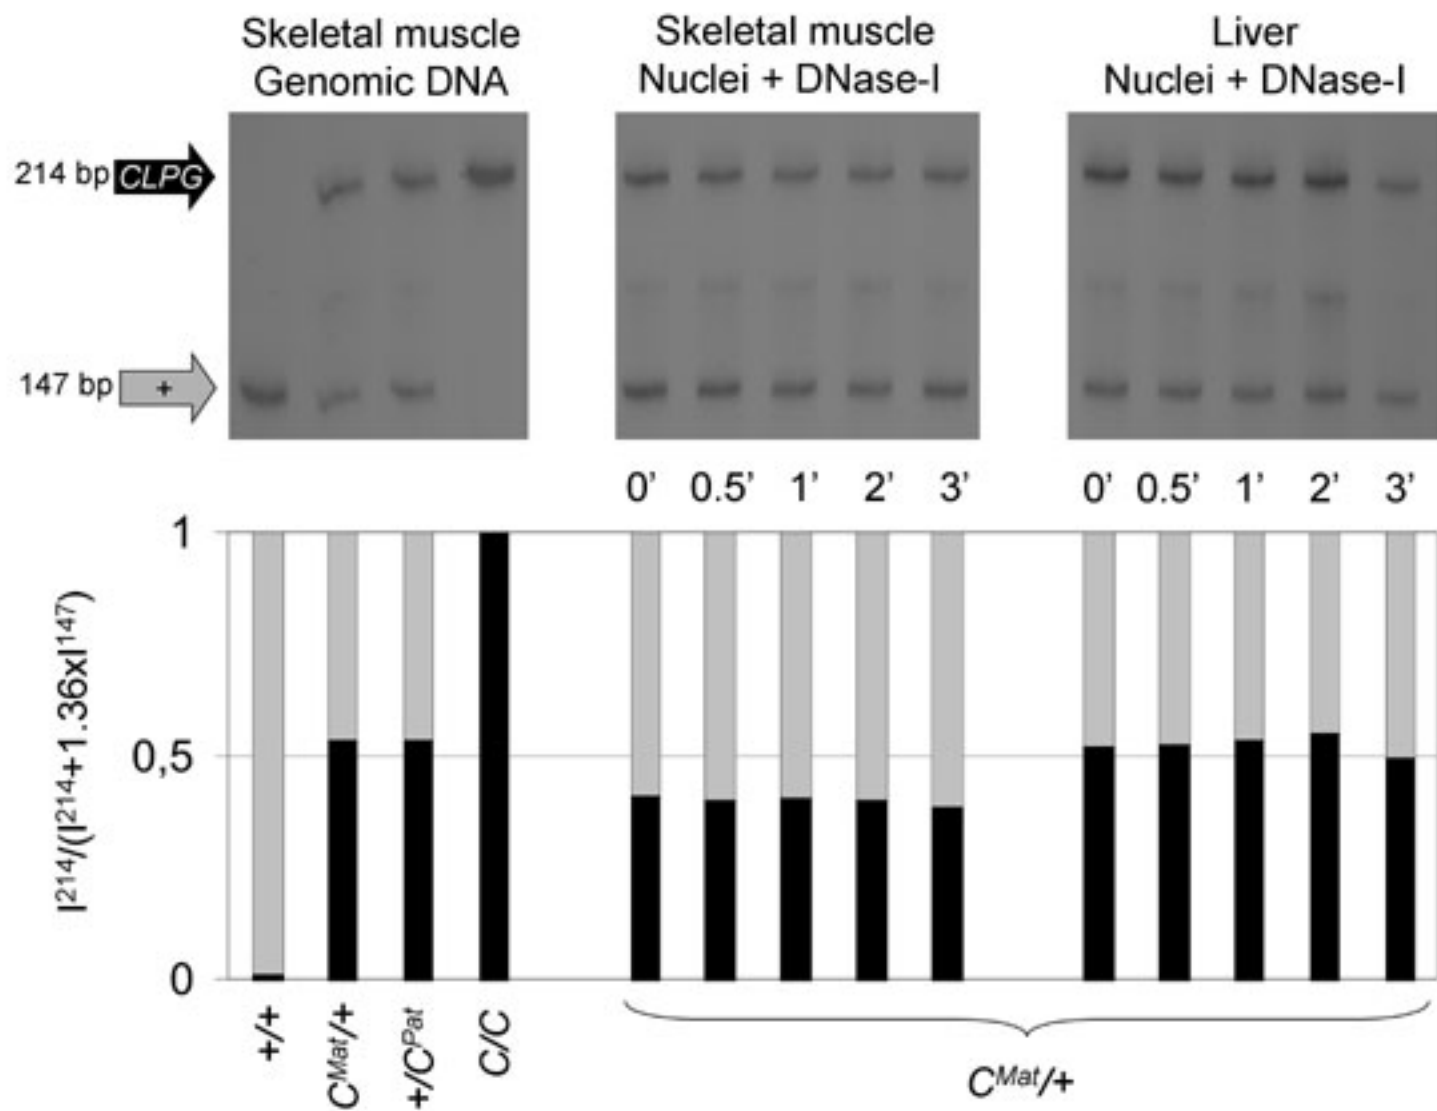

Supplement: pnas_0602844103_2.pdf [file pnas_0602844103_2.pdf]

A

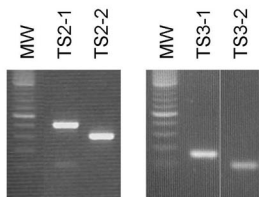

B

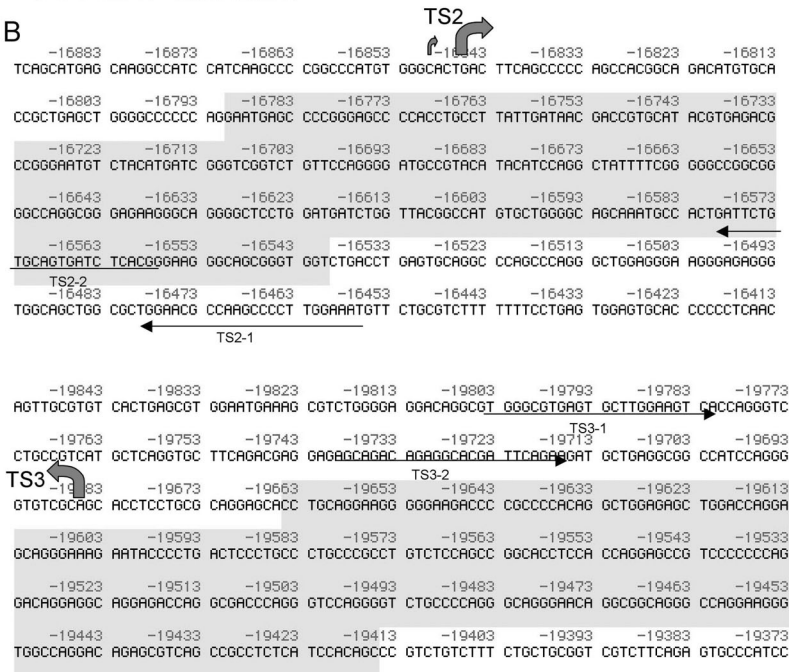

Supplement: pnas_0602844103_3.pdf [file pnas_0602844103_3.pdf]

1 2 3 4 5 6 7 8 9

57 58 59 60 61 62 63 65

64 66 67 68 69 70 71

gDNA

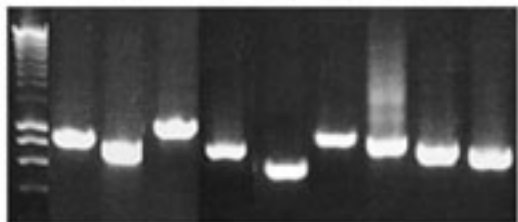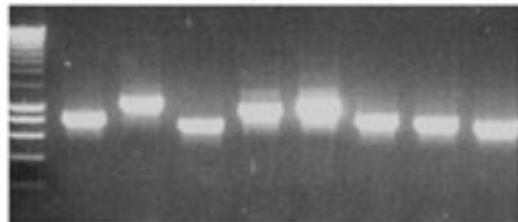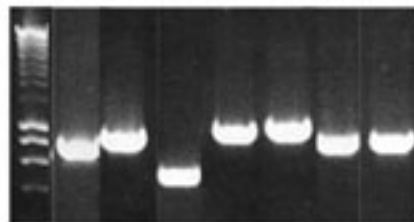

cDNA

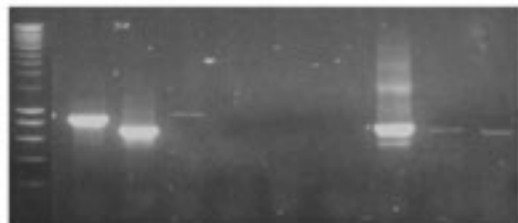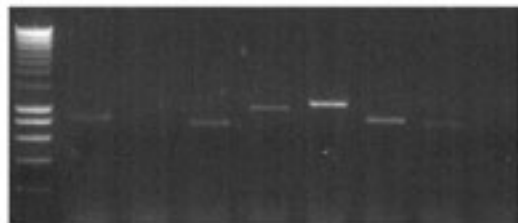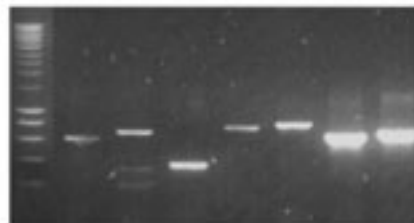

Supplement: pnas_0602844103_4.pdf [file pnas_0602844103_4.pdf]

+ allele

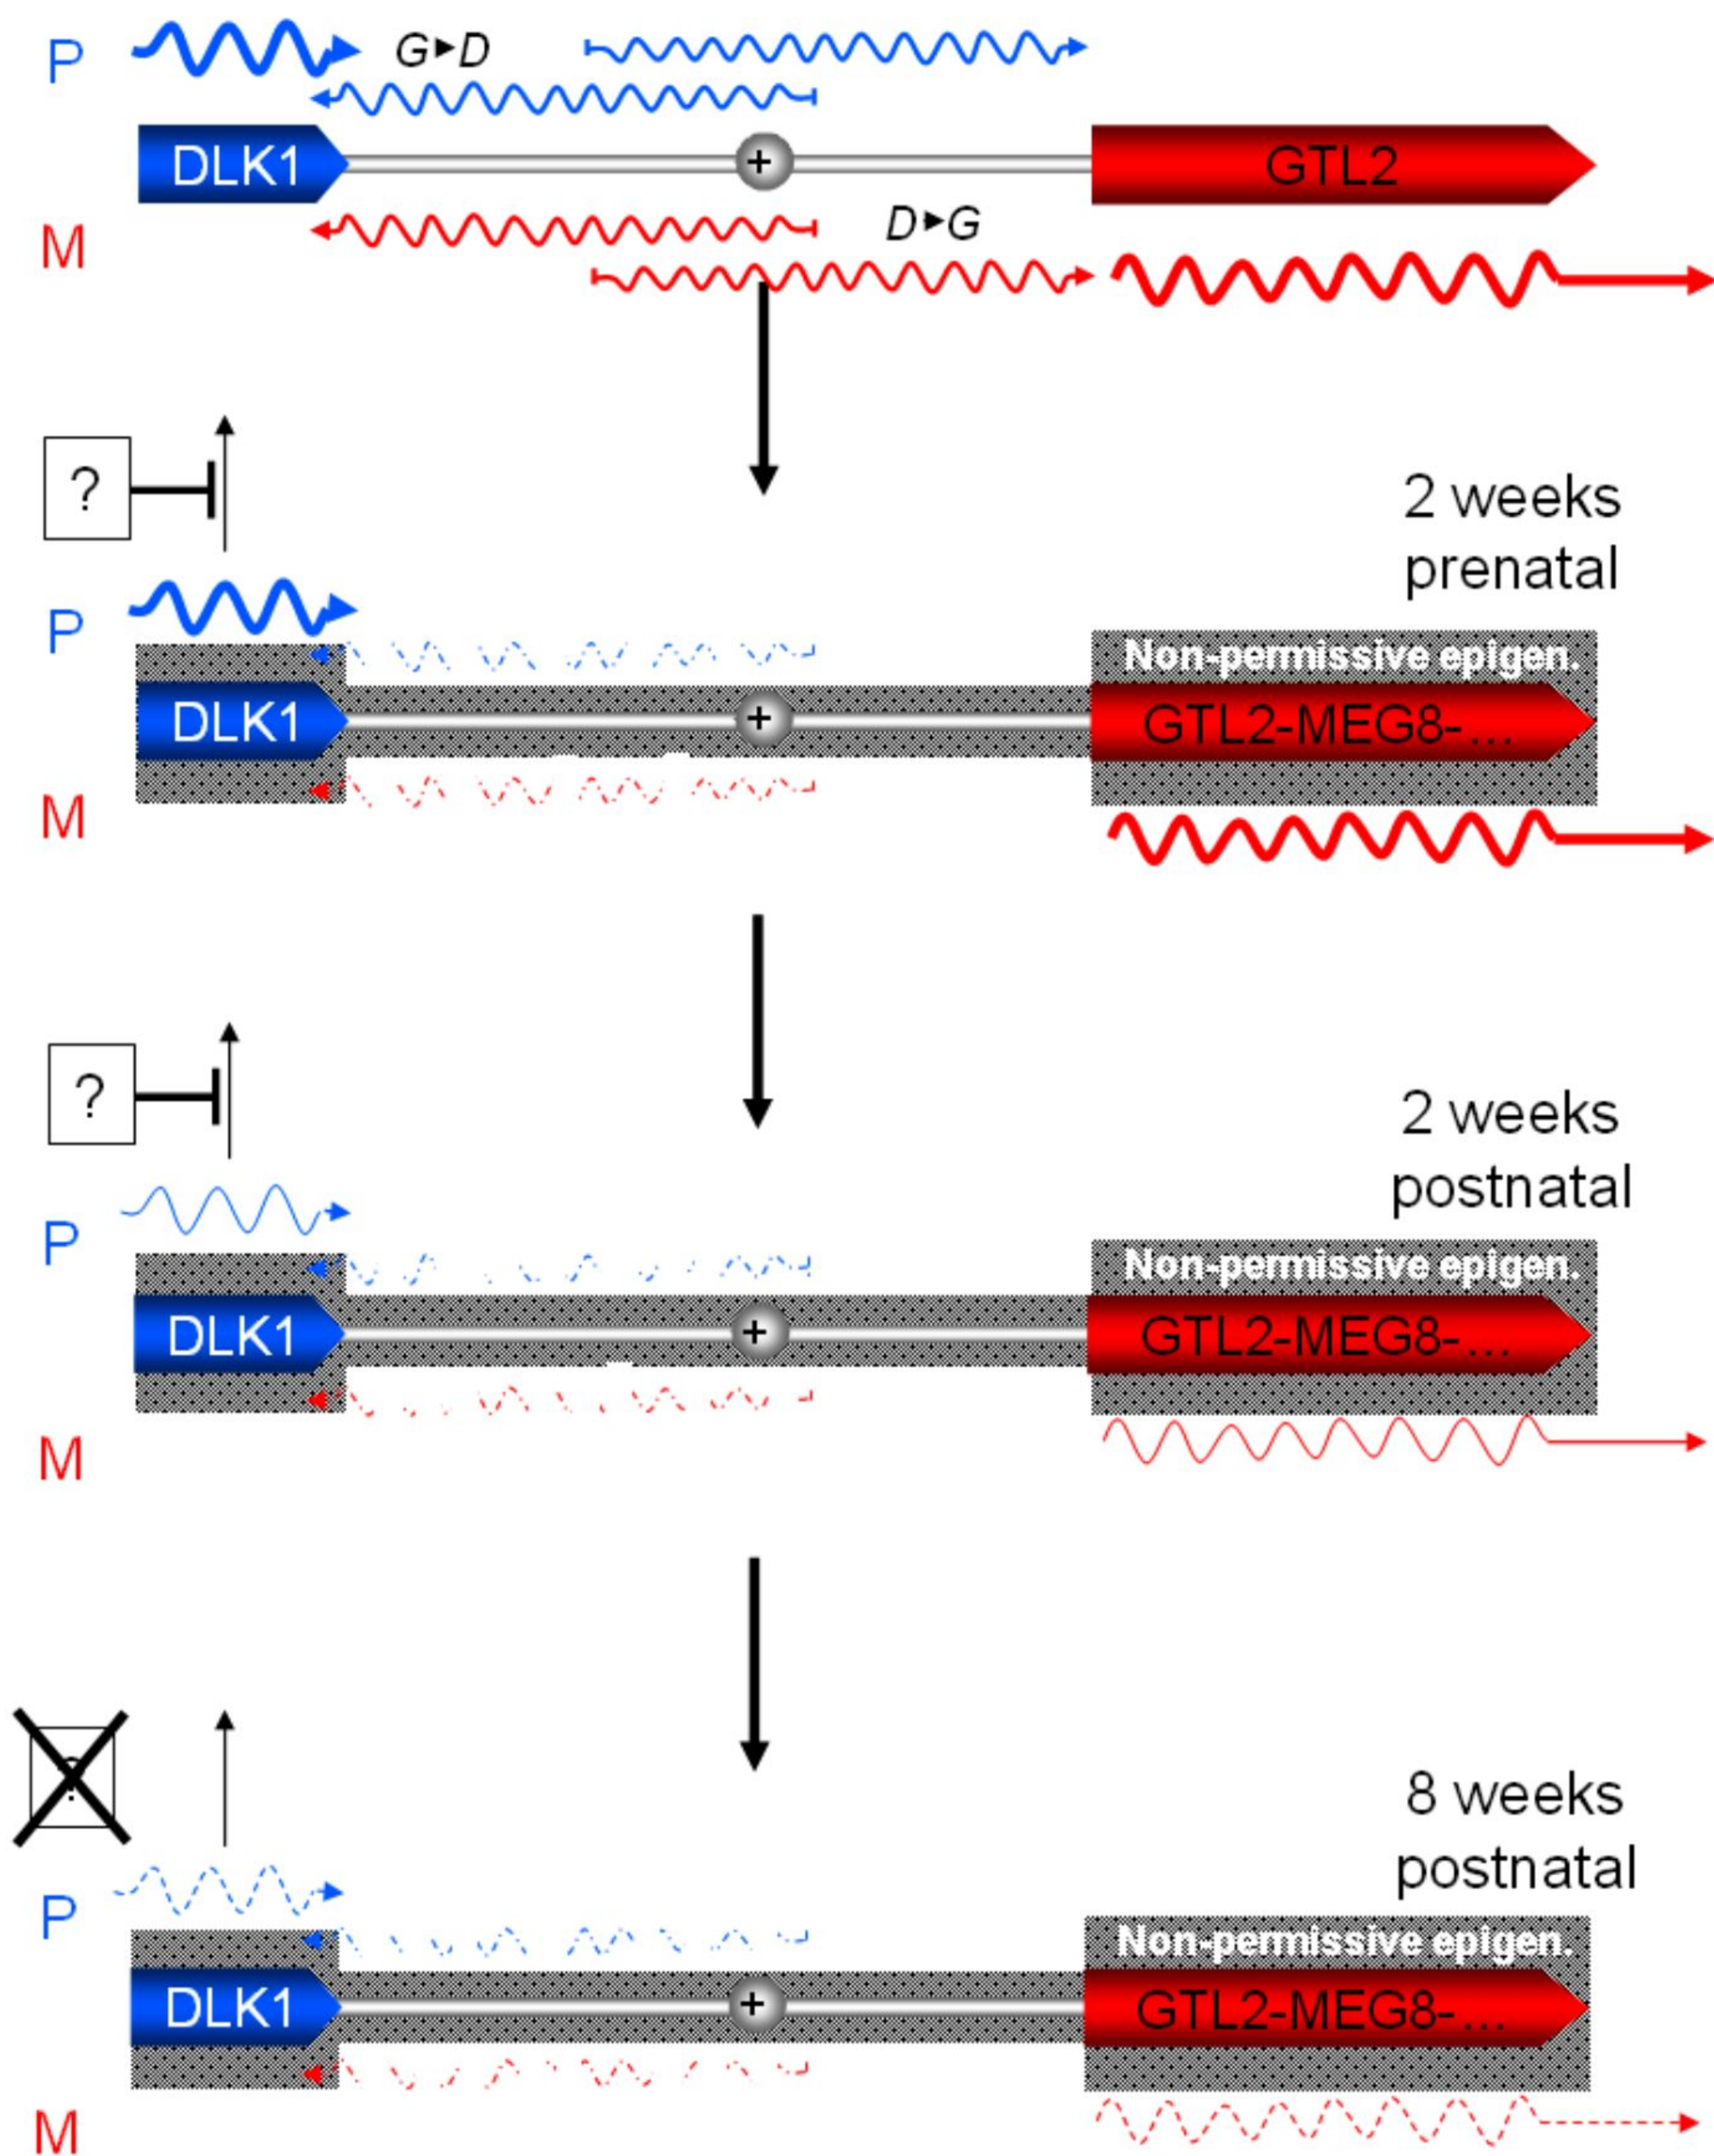

CLPG allele

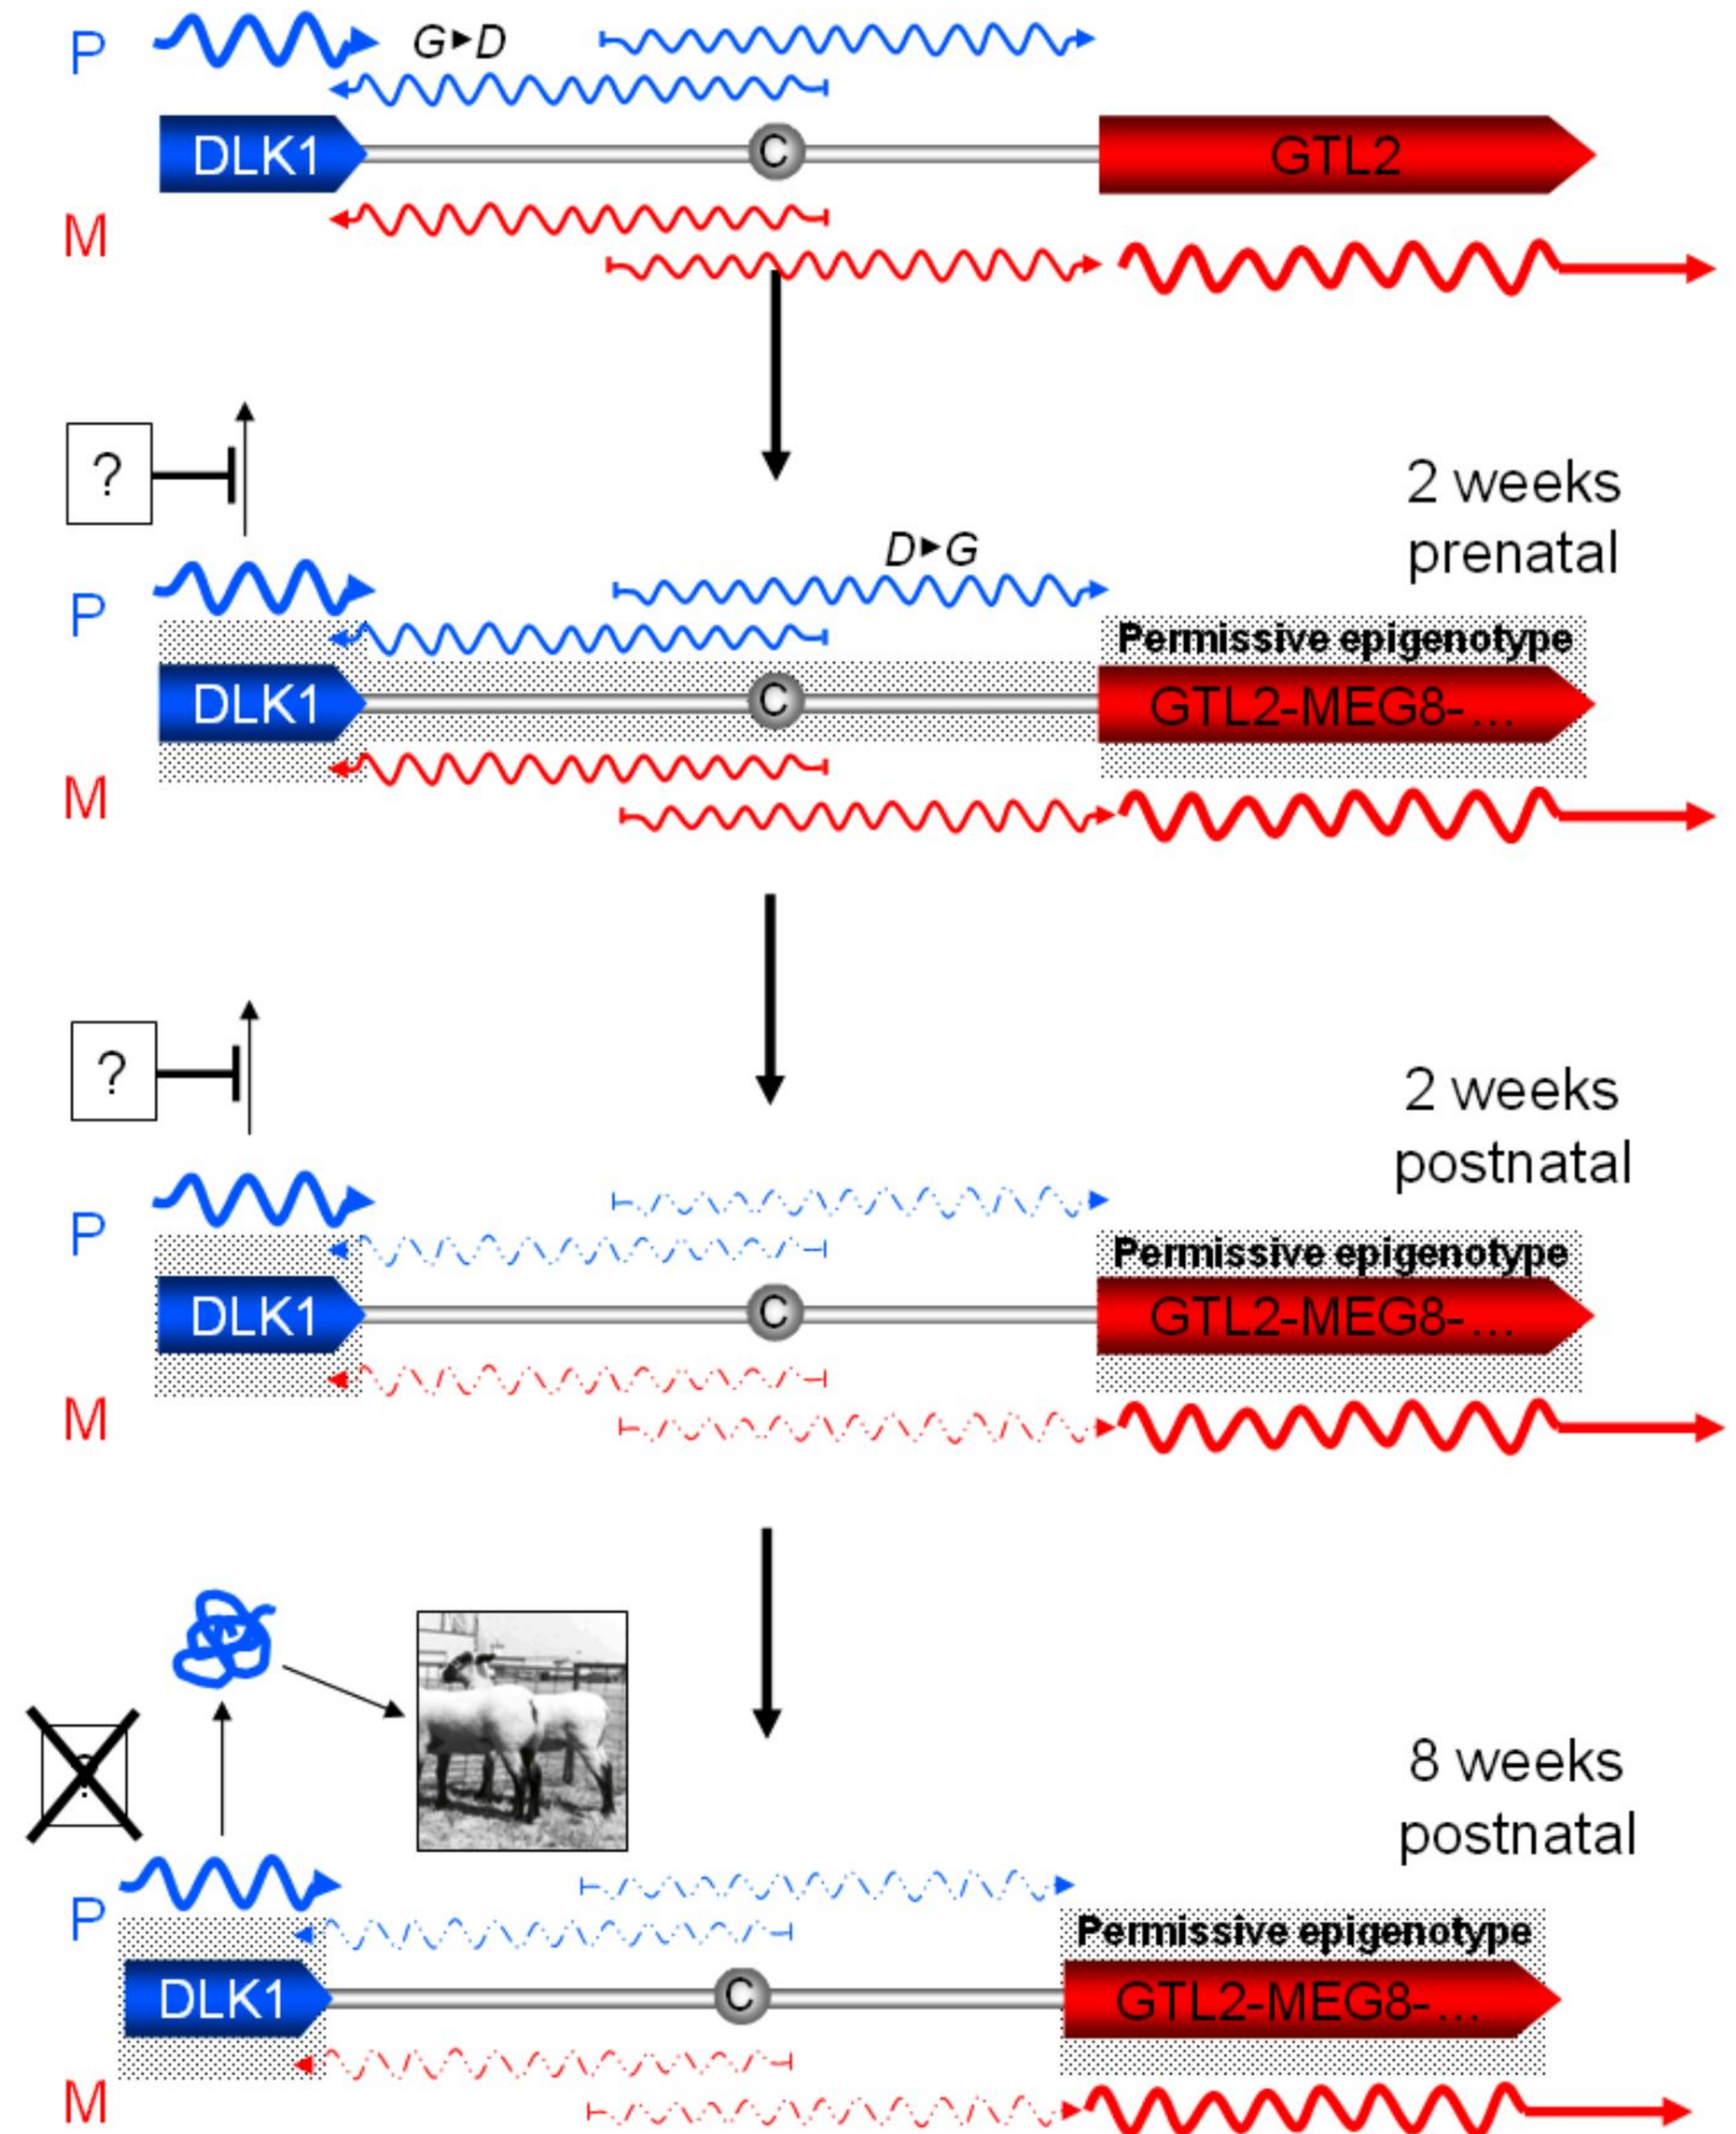

Supplement: pnas_0602844103_5.pdf [file pnas_0602844103_5.pdf]
